# Supplementary material for: Yeast Mannan-Rich Fraction Modulates Endogenous Reactive Oxygen Species Generation and Antibiotic Sensitivity in Resistant E. coli
Source: MDPI journal article supplement (doi:10.3390/ijms24010218), 2022-12-22
Supplement: s1 [file s1]

## Supplementary Information (SI)

This file contains supplementary information for manuscript entitled “Yeast mannan-rich fraction modulates endogenous reactive oxygen species generation and antibiotic sensitivity in resistant *E. coli*”.

Smith H.\*,

Helen Smith\*

Email: [hsmith@alltech.com](mailto:hsmith@alltech.com)

### **This file includes:**

Figures S1, S2 and S3  
Tables S1 and S2

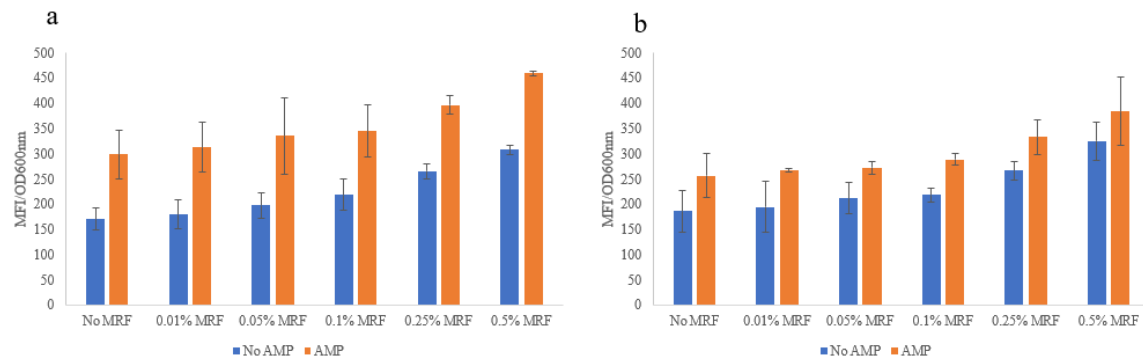

**Figure S1. The effect of MRF (0.01 – 0.5%) on ROS (MFI) combined with and without ampicillin.** Diagram displays mean fluorescent intensity (MFI/OD600nm) of [a] AMP susceptible *E. coli* treated with AMP ( $5\mu\text{g mL}^{-1}$ ) compared to no antibiotic treatment and [b] AMP resistant *E. coli* treated with AMP ( $5\text{mg mL}^{-1}$ ) compared to no antibiotic treatment. Standard deviation is represented by error bars ( $n=6$ ).

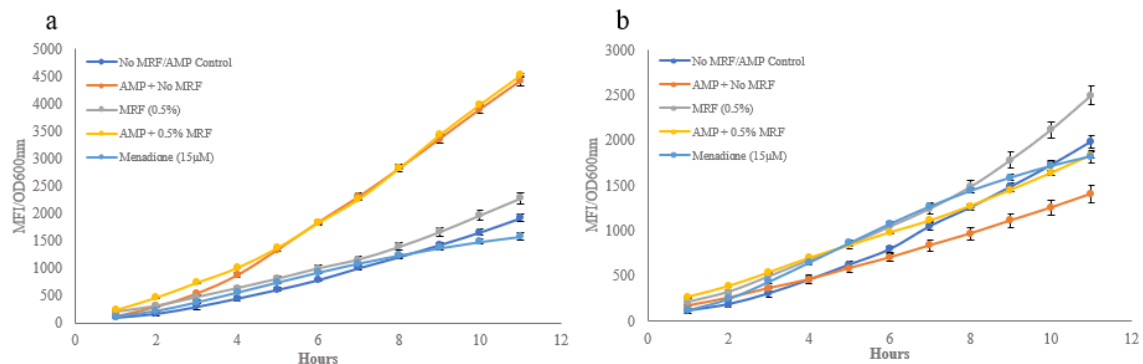

**Figure S2. The effect of MRF on ROS (MFI) with and without ampicillin treatment, over time.** Diagram displays mean fluorescent intensity (MFI/OD600nm) of [a] AMP susceptible *E. coli* over time; control (No MRF/AMP) compared to AMP ( $5\mu\text{g mL}^{-1}$ ), MRF (0.5%, w/v) and MRF (0.5%, w/v) combined with AMP ( $5\mu\text{g mL}^{-1}$ ); [b] AMP resistant *E. coli* over time; control (No MRF/AMP) compared to AMP ( $5\text{mg mL}^{-1}$ ), MRF (0.5%, w/v) and MRF (0.5%, w/v) combined with AMP ( $5\text{mg mL}^{-1}$ ). Standard deviation is represented by error bars ( $n=6$ ). Means that are significantly different to the respective control conditions are marked with an asterisk [\*] ( $p \leq 0.05$ , ANOVA, Fisher-LSD).

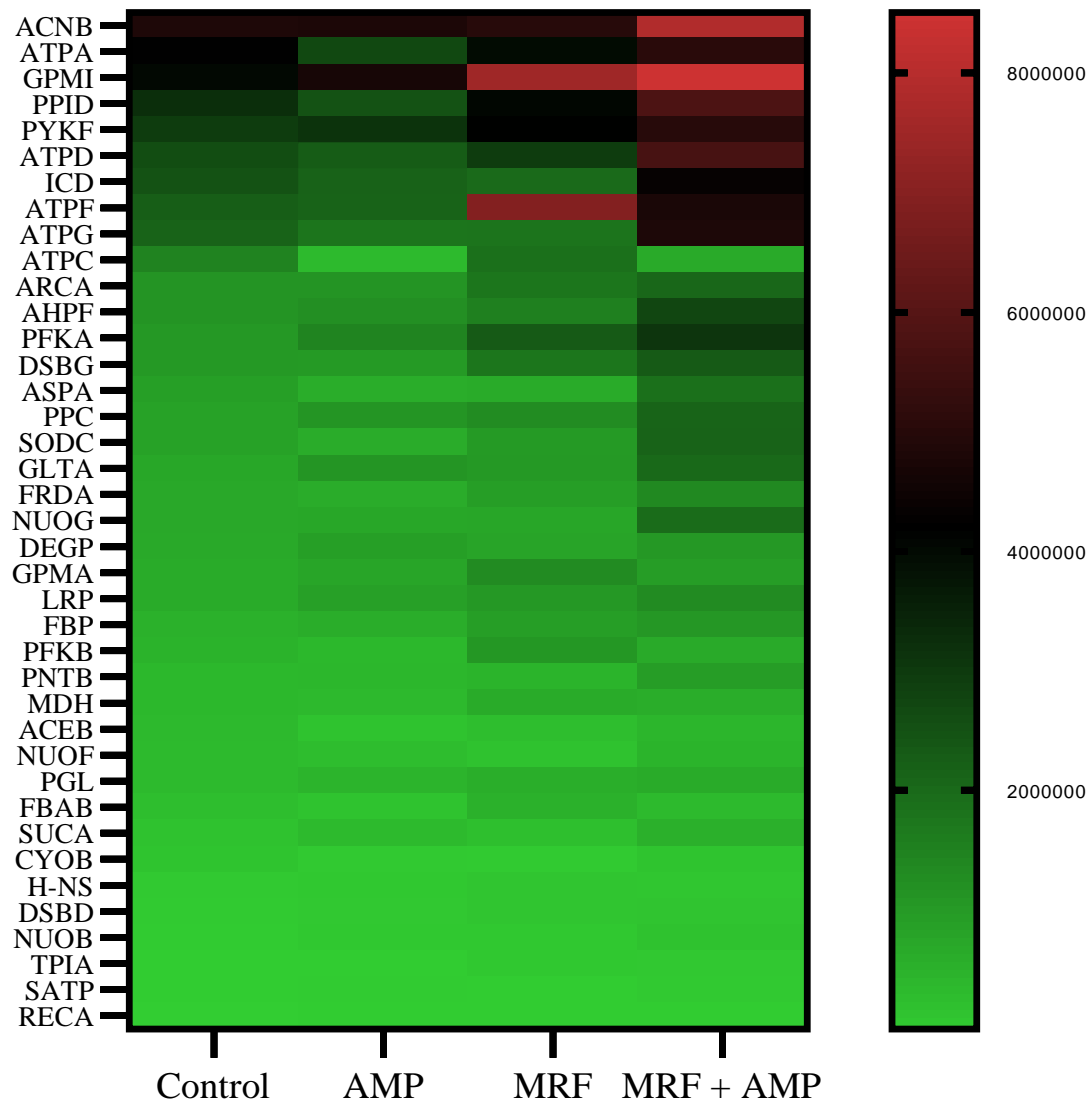

**Figure S3. The influence of MRF and antibiotic treatment on normalized peptide abundance of relevant proteins of interest.** Control culture treated with Amp ( $0.1 \text{ mgmL}^{-1}$  Amp), MRF ( $0.1\%$ , w/v), or combination of Amp ( $0.1 \text{ mgmL}^{-1}$ ) + MRF ( $0.1\%$ , w/v).

**Table S1.** The influence of MRF (1 mgmL<sup>-1</sup>) and antibiotic treatment (0.1 mgmL<sup>-1</sup> AMP) on fold change expression (normalized peptide abundance) of other detected intermediates of the citric acid cycle compared to control.

| Accession  | Protein | PC | UP | PSM | SC (%) | MRF                      |                 | AMP                      |                 | MRF + AMP                |                 | Highest Mean Condition |
|------------|---------|----|----|-----|--------|--------------------------|-----------------|--------------------------|-----------------|--------------------------|-----------------|------------------------|
|            |         |    |    |     |        | Fold change <sup>a</sup> | <i>p</i> -value | Fold change <sup>a</sup> | <i>p</i> -value | Fold change <sup>a</sup> | <i>p</i> -value |                        |
| Q8X7C7     | ACNA    | 9  | 9  | 71  | 12     | -0.15                    | 0.14            | -0.21                    | 0.09            | +0.44                    | 0.28            | MRF + AMP              |
| P0A838     | SUCC    | 8  | 8  | 73  | 24     | +0.43                    | 0.20            | -0.18                    | 0.21            | +0.17                    | 0.21            | MRF                    |
| P0AGF1     | SUCD    | 6  | 6  | 48  | 24     | +0.09                    | 0.56            | -0.40                    | 0.17            | -0.57                    | 0.12            | MRF                    |
| P0AC43     | SDHA    | 2  | 2  | 12  | 3      | +0.55                    | 0.10            | +0.22                    | 0.40            | +0.19                    | 0.55            | MRF                    |
| A0A0H3JRL7 | FUMA    | 4  | 2  | 10  | 10     | +2.06                    | 0.25            | +1.61                    | 0.30            | +3.96                    | 0.08            | MRF + AMP              |
| P0A8Q2     | FRDC    | 1  | 1  | 6   | 8      | +0.45                    | 0.28            | +0.09                    | 0.71            | -0.32                    | 0.29            | MRF                    |
| Q8XDS0     | ASPA    | 7  | 7  | 31  | 12     | -0.27                    | 0.23            | -0.31                    | 0.15            | +1.02                    | 0.06            | MRF + AMP              |
| Q8X743     | PPC     | 14 | 14 | 102 | 18     | +0.52                    | 0.17            | +0.31                    | 0.21            | +0.45                    | 0.12            | MRF                    |

<sup>a</sup>Fold change increase symbolized with a [+]. Fold change decrease symbolized with a [-]. Unequal variances T-test comparison of each treatment group to control was performed, ANOVA ( $p \leq 0.05$ ). Abbreviations: PC; Peptide count, UP; Unique peptides, SC (%); PSM; Peptide spectrum match; Sequence coverage (%); ACNA; Aconitate hydratase, SUCC; Succinate--CoA ligase [ADP-forming] subunit beta, SUCD; Succinate-CoA ligase [ADP-forming] subunit alpha, SDHA; Succinate dehydrogenase flavoprotein subunit, FUMA; Fumarate hydratase class I, FRDC; Fumarate reductase subunit C, ASPA; Aspartate ammonia-lyase, PPC; Phosphoenolpyruvate carboxylase.

**Table S2.** The influence of MRF (1 mgmL<sup>-1</sup>) and antibiotic treatment (0.1 mgmL<sup>-1</sup> AMP) on fold change expression (normalized peptide abundance) of other detected key components of central metabolic pathways compared to control.

|                                                 | Accession  | Protein | PC | UP | PSM | SC (%) | MRF                      |         | AMP                      |         | MRF + AMP                |         | Highest Mean Condition |
|-------------------------------------------------|------------|---------|----|----|-----|--------|--------------------------|---------|--------------------------|---------|--------------------------|---------|------------------------|
|                                                 |            |         |    |    |     |        | Fold change <sup>a</sup> | p-value | Fold change <sup>a</sup> | p-value | Fold change <sup>a</sup> | p-value |                        |
| <u>Acetyl-coenzyme A</u>                        | Q8XCU8     | PTA     | 10 | 10 | 56  | 18     | +0.12                    | 0.62    | -0.25                    | 0.39    | +0.32                    | 0.23    | MRF + AMP              |
|                                                 | P0A6A5     | ACKA    | 2  | 2  | 9   | 8      | +0.19                    | 0.52    | +0.21                    | 0.51    | +0.81                    | 0.35    | MRF + AMP              |
|                                                 | Q8X5T5     | ACS     | 1  | 1  | 3   | 2      | -0.42                    | 0.27    | -0.17                    | 0.54    | +0.52                    | 0.23    | MRF + AMP              |
|                                                 | Q8X6L4     | POXB    | 6  | 6  | 31  | 10     | +0.04                    | 0.75    | +0.01                    | 0.94    | +0.57                    | 0.09    | MRF + AMP              |
| <u>EMP pathway</u>                              | P0A8A6     | PPSR    | 1  | 1  | 4   | 3      | -0.24                    | 0.12    | -0.17                    | 0.10    | +0.27                    | 0.33    | MRF + AMP              |
|                                                 | P0A9B4     | GAPA    | 9  | 9  | 70  | 30     | +0.95                    | 0.07    | +0.05                    | 0.82    | +0.09                    | 0.68    | MRF                    |
|                                                 | Q8XD03     | PGK     | 11 | 11 | 67  | 26     | -0.01                    | 0.86    | -0.12                    | 0.35    | +1.27                    | 0.06    | MRF + AMP              |
|                                                 | P0A6Q1     | ENO     | 13 | 13 | 71  | 46     | +3.62                    | 0.12    | +0.30                    | 0.36    | +3.92                    | 0.06    | MRF + AMP              |
|                                                 | P0ADF7     | EDD     | 2  | 2  | 10  | 7      | +0.91                    | 0.18    | -0.18                    | 0.62    | +0.47                    | 0.33    | MRF                    |
|                                                 | Q8X774     | PNTA    | 1  | 1  | 4   | 2      | -0.44                    | 0.06    | -0.25                    | 0.17    | +0.34                    | 0.17    | MRF + AMP              |
|                                                 | Q7DBF8     | GND     | 9  | 9  | 61  | 28     | +0.28                    | 0.24    | -0.18                    | 0.37    | +0.65                    | 0.23    | MRF + AMP              |
|                                                 | P0A8A6     | PPSR    | 1  | 1  | 4   | 3      | -0.24                    | 0.12    | -0.17                    | 0.11    | +0.27                    | 0.33    | MRF + AMP              |
| <u>OxPhos</u>                                   | P0ABJ0     | CYOB    | 1  | 1  | 7   | 1      | -0.70                    | 0.06    | -0.57                    | 0.02    | +0.01                    | 0.86    | MRF + AMP              |
| <u>Bacterial stress signalling and response</u> | P66828     | SODA    | 4  | 4  | 46  | 18     | +0.17                    | 0.47    | -0.31                    | 0.33    | +0.28                    | 0.54    | MRF + AMP              |
|                                                 | P0AGD5     | SODB    | 1  | 1  | 5   | 8      | +0.81                    | 0.39    | +0.42                    | 0.61    | +0.81                    | 0.36    | MRF + AMP              |
|                                                 | A0A0H3JFP5 | KATE    | 18 | 18 | 110 | 24     | +0.08                    | 0.86    | -0.29                    | 0.56    | +0.32                    | 0.51    | MRF + AMP              |
|                                                 | Q7A978     | KATG1   | 10 | 10 | 53  | 13     | +0.66                    | 0.09    | +0.05                    | 0.55    | +0.35                    | 0.45    | MRF                    |
|                                                 | Q7ABA5     | RPOS    | 1  | 1  | 11  | 3      | +0.07                    | 0.36    | +0.33                    | 0.35    | +0.79                    | 0.10    | MRF + AMP              |
|                                                 | P0ACK0     | CRP     | 6  | 6  | 38  | 33     | +0.39                    | 0.12    | -0.40                    | 0.16    | +0.05                    | 0.81    | MRF                    |
|                                                 | P0AE89     | CPXR    | 3  | 3  | 33  | 13     | +0.06                    | 0.75    | -0.49                    | 0.13    | -0.29                    | 0.22    | MRF                    |
|                                                 | P66798     | UVRV    | 1  | 1  | 7   | 6      | +0.43                    | 0.26    | -0.20                    | 0.46    | +0.87                    | 0.06    | MRF + AMP              |
|                                                 | Q8XDH7     | TREA    | 7  | 7  | 59  | 14     | -0.26                    | 0.18    | -0.21                    | 0.22    | +0.09                    | 0.44    | MRF + AMP              |
|                                                 | P0A6Y3     | IHF     | 1  | 1  | 6   | 10     | +1.32                    | 0.15    | -0.40                    | 0.19    | +1.77                    | 0.16    | MRF + AMP              |
|                                                 | P0A974     | CSPE    | 2  | 2  | 6   | 39     | -0.33                    | 0.13    | -0.11                    | 0.63    | +0.10                    | 0.56    | MRF + AMP              |
|                                                 | P0AEG5     | DSBA    | 4  | 4  | 23  | 24     | +0.55                    | 0.24    | -0.01                    | 0.96    | -0.58                    | 0.22    | MRF                    |
|                                                 | P0AEG7     | DSBC    | 2  | 2  | 14  | 7      | +0.51                    | 0.49    | +0.65                    | 0.41    | +3.63                    | 0.17    | MRF + AMP              |
|                                                 | P0AFL5     | PPIA    | 2  | 2  | 18  | 15     | +0.07                    | 0.27    | +0.01                    | 0.77    | +1.71                    | 0.20    | MRF + AMP              |

<sup>a</sup>Fold change increase symbolized with a [+]. Fold change decrease symbolized with a [-]. Unequal variances T-test comparison of each treatment group to control was performed, ANOVA ( $p \leq 0.05$ ). Abbreviations: PC; Peptide count, UP; Unique peptides, SC (%); PSM; Peptide spectrum match; Sequence coverage (%); PTA; Phosphate acetyltransferase, ACKA; Acetate kinase, ACS; Acetyl-coenzyme A synthetase, POXB; Pyruvate dehydrogenase, PPSR; Phosphoenolpyruvate synthase regulatory protein, GAPA; Glyceraldehyde-3-phosphate dehydrogenase A, PGK; Phosphoglycerate kinase, ENO; Enolase, EDD; Phosphogluconate dehydratase, PNTA; NAD(P) transhydrogenase subunit alpha, GND; 6-phosphogluconate dehydrogenase, decarboxylating, PPSR; Phosphoenolpyruvate synthase regulatory protein, CYOB; Cytochrome bo(3) ubiquinol oxidase subunit 1, SODA; Superoxide dismutase [Mn], SODB; Superoxide dismutase [Fe], KATE; Catalase, KATG1; Catalase-peroxidase 1, RPOS; RNA polymerase sigma factor RpoS, CRP; cAMP-activated global transcriptional regulator, CPXR; Transcriptional regulatory protein, UVRV; Response regulator, TREA; Putative periplasmic trehalase, IHF; Integration host factor subunit beta, CSPE; Cold shock-like protein, DSBA; Thiol:disulfide interchange protein, DSBC; Thiol:disulfide interchange protein, PPIA; Peptidyl-prolyl cis-trans isomerase A.
